# Supplementary material
Source: publisher site journal article supplement (https://www.dovepress.com/get_supplementary_file.php?f=476285.docx)
Supplement: Supplementary file 1 [file get_supplementary_file.php]

**Appendix Table 1. Care-seeking Frequency, Decision Preference, and Experience across Race/Ethnicity by Income (N=1,485)a**

|  | **Hispanic**  **vs.**  **White** | **Asian  vs.**  **White** | | **Black  vs.**  **White** | | **Hispanic**  **vs.**  **Asian** | **Hispanic**  **vs.**  **Black** | **Asian  vs.**  **Black** |
| --- | --- | --- | --- | --- | --- | --- | --- | --- |
|  | ***Lower Income (< US$49,999)*** | | | | | | | |
| ***% of subgroup visiting HCP regularly***b | | | | | | | | |
| PCP  (p=0.012)  *p-value* | 64.7%, 75.8%  ***0.005*** | 63.5%, 75.8%  ***0.004*** | | 67.7%, 75.8%  ***0.037*** | | 64.7%, 63.5%  *0.792* | 64.7%, 67.7%  *0.469* | 63.5%, 67.7%  *0.344* |
| Chronic Disease  Specialist (p=0.057)  *p-value* | 58.5%, 56.6%  *0.736* | 42.3%, 56.6%  ***0.020*** | | 50.3%, 56.6%  *0.241* | | 58.5%, 42.3%  ***0.016*** | 58.5%, 50.3%  *0.172* | 42.3%, 50.3%  *0.215* |
| Dentist  (p=0.248)  *p-value* | 36.8%, 42.0%  *0.228* | 40.5%, 42.0%  *0.747* | | 34.1%, 42.0%  *0.061* | | 36.8%, 40.5%  *0.431* | 36.8%, 34.1%  *0.524* | 40.5%, 34.1%  *0.164* |
| Optometrist  (p<0.001)  *p-value* | 29.6%, 45.2%  ***<0.001*** | 30.9%, 45.2%  ***0.002*** | | 36.1%, 45.2%  ***0.033*** | | 29.6%, 30.9%  *0.755* | 29.6%, 36.1%  *0.119* | 30.9%, 36.1%  *0.252* |
| Gynecologist  (p=0.212)  *p-value* | 31.3%, 26.2%  *0.334* | 20.2%, 26.2%  *0.269* | | 31.5%, 26.2%  *0.320* | | 31.3%, 20.2%  *0.066* | 31.3%, 31.5%  *0.973* | 20.2%, 31.5%  *0.064* |
| ***Preference/experience: mean [SD]***c | | | | | | | | |
| Q1-Choice Importance  (p=0.008)  *p-value* | 4.02 [0.98], 4.19 [0.90]  *0.059* | 3.96 [0.98], 4.19 [0.90] ***0.010*** | | 4.22 [0.88], 4.19 [0.90] *0.676* | | 4.02 [0.98], 3.96 [0.98] *0.446* | 4.02 [0.98], 4.22 [0.88] ***0.025*** | 3.96 [0.98], 4.22 [0.88] ***0.004*** |
| Q2-Difficulty finding  a HCP (p=0.008)  *p-value* | 3.34 [1.09], 3.52 [1.15] ***0.045*** | 3.36 [1.06], 3.52 [1.15] *0.075* | | 3.60 [1.17], 3.52 [1.15] *0.334* | | 3.34 [1.09], 3.36 [1.06] *0.882* | 3.34 [1.06], 3.60 [1.17] ***0.003*** | 3.36 [1.06], 3.60 [1.17] ***0.008*** |
|  | ***Higher Income (> US$50,000)*** | | | | | | | |
| ***% of subgroup visiting HCP regularly***b | | | | | | | | |
| PCP  (p=0.030)  *p-value* | 74.1%, 81.4%  *0.221* | 68.0%, 81.4%  ***0.007*** | | | 69.2%, 81.4%  ***0.048*** | 74.1%, 68.0%  *0.439* | 74.1%, 69.2%  *0.582* | 68.0%, 69.2%  *0.822* |
| Chronic Disease  Specialist (p=0.006)  *p-value* | 48.6%, 68.9%  ***0.021*** | 45.8%, 68.9%  ***0.003*** | | | 53.1%, 68.9%  *0.083* | 48.6%, 45.8%  *0.806* | 48.6%, 53.1%  *0.712* | 45.8%, 53.1%  *0.525* |
| Dentist  (p=0<0.001)  *p-value* | 53.7%, 76.4%  ***<0.001*** | 60.0%, 76.4%  ***0.002*** | | | 58.8%, 76.4%  ***0.010*** | 53.7%, 60.0%  *0.456* | 53.7%, 58.8%  *0.599* | 60.0%, 58.8%  *0.891* |
| Optometrist  (p=0.013)  *p-value* | 50.9%, 58.4%  *0.321* | 42.7%, 58.4%  ***0.009*** | | | 39.2%, 58.4%  ***0.012*** | 50.9%, 42.7%  *0.336* | 50.9%, 39.2%  *0.232* | 42.7%, 39.2%  *0.683* |
| Gynecologist  (p=0.028)  *p-value* | 35.3%, 50.9%  *0.232* | 21.9%, 50.9%  ***0.004*** | | | 40.9%, 50.9%  *0.394* | 35.3%, 21.9%  *0.316* | 35.3%, 40.9%  *0.724* | 21.9%, 40.9%  *0.136* |
| ***Preference/experience: mean [SD]***c | | | | | | | | |
| Q1-Choice Importance  (p=0.137)  *p-value* | 4.17 [0.93], 4.23 [0.85]  *0.740* | | 3.95 [1.01], 4.23 [0.85]  ***0.019*** | | 4.19 [0.89], 4.23 [0.85]  *0.767* | 4.17 [0.93], 3.95 [1.01]  *0.198* | 4.17 [0.93], 4.19 [0.89]  *0.973* | 3.95 [1.01], 4.19 [0.80]  *0.173* |
| Q2-Difficulty finding  a HCP (p=0.068)  *p-value* | 3.28 [1.24], 3.63 [1.11]  *0.059* | | 3.38 [1.05], 3.63 [1.11]  ***0.033*** | | 3.63 [1.17], 3.63 [1.11]  *0.929* | 3.28 [1.24], 3.38 [1.05]  *0.740* | 3.28 [1.24], 3.63 [1.17]  *0.142* | 3.38 [1.05], 3.63 [1.17]  *0.147* |

a Of the total 1,485 participants, 40 responded “prefer not to answer” for the income questions and were excluded from the analyses. The resulting subgroup sizes were Lower-Income=564 and Higher-Income=881. Within the Lower-Income category, the racial breakdown was: Hispanic=147, Asian=95, Black=152, and White=170. Within the Higher-Income category, Hispanic=156, Asian=199, Black=157, White=369. Pairwise comparisons across race/ethnicity were performed within each income subgroup. P-values are presented in italic under the two comparing values; those that are significant (p<0.05) are bolded. The p-values in parentheses reported in the first column indicate whether the particular HCP visit frequency or preference/experience overall was significantly associated with race/ethnicity in the respective income subgroup.

b All participants were asked whether they regularly visit a primary care provider (PCP), dentist, and optometrist. Participants who reported having a chronic disease were asked whether they regularly see a specialist for it; the subgroup sizes were Lower-Income (Hispanic=130, Asian=97, Black=153, White=205) and Higher-Income (Hispanic=170, Asian=153, Black=188, White=389). Participants who did not self-identify as male were asked whether they regularly see a gynecologist; the subgroup sizes were Lower-Income (Hispanic=128, Asian=94, Black=124, White=183) and Higher-Income (Hispanic=151, Asian=137, Black=313, and White 151). The reported percentages are calculated based on the subgroup sizes, respectively.

c For care-seeking preference and experience, participants were asked Q1: “From not at all important (1) to extremely important (5), how important is it for you to have a say in choosing your own provider?” and Q2: “On a scale from very difficult (1) to very easy (5), how difficult would you say it is for you to find a healthcare provider when you need one?”

**Appendix Table 2. Care-seeking Frequency, Decision Preference, and Experience across Race/Ethnicity by Education (N=1,485)a**

|  | **Hispanic**  **vs.**  **White** | **Asian  vs.**  **White** | **Black  vs.**  **White** | **Hispanic**  **vs.**  **Asian** | **Hispanic**  **vs.**  **Black** | **Asian  vs.**  **Black** |
| --- | --- | --- | --- | --- | --- | --- |
|  | ***Lower Education (without college degree)*** | | | | | |
| ***% of subgroup visiting HCP regularly***b | | |  |  |  |  |
| PCP  (p=0.013)  *p-value* | 61.8%, 75.4%  ***0.002*** | 64.5%, 75.4%  ***0.035*** | 66.0%, 75.4%  ***0.028*** | 61.8%, 64.5%  *0.645* | 61.8%, 66.0%  *0.384* | 64.5%, 66.0%  *0.791* |
| Chronic Disease  Specialist (p=0.070)  *p-value* | 54.8%, 56.6%  *0.655* | 40.7%, 57.5%  ***0.030*** | 45.9%, 57.5%  ***0.047*** | 54.8%, 40.7%  *0.095* | 54.8%, 45.9%  *0.183* | 40.7%, 45.9%  *0.526* |
| Dentist  (p=0.197)  *p-value* | 34.7%, 41.4%  *0.144* | 39.3%, 41.4%  *0.704* | 32.3%, 41.4%  ***0.048*** | 34.7%, 39.3%  *0.428* | 34.7%, 32.3%  *0.620* | 39.3% 32.3%  *0.226* |
| Optometrist  (p=0.088)  *p-value* | 31.8%, 42.0%  ***0.027*** | 32.1%, 42.0%  *0.080* | 33.8%, 42.0%  *0.080* | 31.8%, 32.1%  *0.963* | 31.8%, 33.8%  *0.669* | 32.1%, 33.8%  *0.756* |
| Gynecologist  (p=0.897)  *p-value* | 26.0%, 28.7%  *0.630* | 24.0%, 28.7%  *0.513* | 28.6%, 28.7%  *0.976* | 26.0%, 24.0%  *0.791* | 26.0%, 28.6%  *0.691* | 24.0%, 28.6%,  *0.560* |
| ***Preference/experience: mean [SD]***c | | | | | | |
| Q1-Choice Importance  (p=0.090) *p-value* | 4.01 [0.98], 4.17 [0.90]  *0.072* | 3.98 [0.94],  4.17 [0.90]  *0.057* | 4.17 [0.92], 4.17 [0.90]  *0.973* | 4.01 [0.98], 3.98 [0.94]  *0.716* | 4.01 [0.98], 4.17 [0.92]  *0.092* | 3.98 [0.94], 4.17 [0.92]  *0.073* |
| Q2-Difficulty finding  a HCP (p=0.001)  *p-value* | 3.29 [1.10], 3.55 [1.14]  ***0.009*** | 3.29 [1.06], 3.55 [1.14]  ***0.030*** | 3.63 [1.17], 3.55 [1.14]  *0.370* | 3.29 [1.10], 3.29 [1.06]  *0.928* | 3.29 [1.10], 3.63 [1.17]  ***0.001*** | 3.29 [1.06], 3.63 [1.17]  ***0.006*** |
|  | ***Higher Education (with college degree)*** | | | | | |
| ***% of subgroup visiting HCP regularly***b | | | | | | |
| PCP  (p=0.003)  *p-value* | 73.0%, 81.5%  *0.061* | 66.8%, 81.5%  ***<0.001*** | 72.4%, 81.5%  ***0.044*** | 73.0%, 66.8%  *0.249* | 73.0%, 72.4%  *0.915* | 66.8%, 72.4%  *0.300* |
| Chronic Disease  Specialist (p=0.015)  *p-value* | 59.1%, 66.7%  *0.262* | 47.5%, 66.7%  ***0.001*** | 62.1%, 66.7%  *0.499* | 59.1%, 47.5%  *0.683* | 59.1%, 62.1%  *0.723* | 47.5%, 62.1%  *0.065* |
| Dentist  (p<0.001)  *p-value* | 49.6%, 73.8%  ***<0.001*** | 52.2%, 73.8%  ***<0.001*** | 49.6%, 73.8%  ***<0.001*** | 49.6%, 52.2%  *0.649* | 49.6%, 49.6%  *0.999* | 52.2%, 49.6%  *0.648* |
| Optometrist  (p<0.001)  *p-value* | 36.3%, 60.5%  *<****0.001*** | 38.6%, 60.5%  ***< 0.001*** | 41.7%, 60.5%  ***<0.001*** | 36.3%, 38.6%  *0.683* | 36.3%, 41.7%  *0.400* | 38.6%, 41.7%  *0.585* |
| Gynecologist  (p=0.003)  *p-value* | 41.2%, 43.1%  *0.816* | 19.8%, 43.1%  ***<0.001*** | 40.0%, 43.1%  *0.689* | 41.2%, 19.8%  ***0.007*** | 41.2%, 40.0%  *0.900* | 19.8%, 40.0%  ***0.008*** |
| ***Preference/experience: mean [SD]***c | | | | | | |
| Q1-Choice Importance  (p=0.002)  *p-value* | 4.16 [0.95], 4.24 [0.85]  *0.544* | 3.94 [1.02], 4.24 [0.85]  ***<0.001*** | 4.32 [0.78], 4.24 [0.85]  *0.551* | 4.16 [0.95], 3.94 [1.02],  ***0.047*** | 4.16 [0.95], 4.32 [0.78]  *0.319* | 3.94 [1.02], 4.32 [0.78]  ***0.001*** |
| Q2-Difficulty finding  a HCP (p=0.078)  *p-value* | 3.39 [1.16], 3.59 [1.13]  *0.117* | 3.39 [1.06], 3.59 [1.13]  ***0.025*** | 3.59 [1.17], 3.59 [1.13]  *0.946* | 3.39 [1.16], 3.39 [1.06]  *0.825* | 3.39 [1.16], 3.59 [1.17]  *0.179* | 3.39 [1.06], 3.59 [1.17]  *0.071* |

a Of the total 1,485 participants, one responded “prefer not to answer” for the education question and was excluded from the analyses. The resulting subgroup sizes were Low-Education=762 and High-Education=722. The racial/ethnic breakdown of Lower-Education category was Hispanic=199, Asian=107, Black=200, White=256; Higher-Education category was Hispanic=115, Asian=205, Black=116, White=286. Pairwise comparisons across race/ethnicity were performed within each subgroup. P-values are presented in italic under the two comparing values; those that are significant (p<0.05) are bolded. The p-values in parentheses in the first column indicate whether the a particular HCP visit frequency or preference/experience overall was significantly associated with race/ethnicity in the respective subgroup.

b All participants were asked whether they regularly visit a primary care provider (PCP), dentist, and optometrist. Participants who reported having a chronic disease were asked whether they regularly see a specialist for it; the subgroup sizes were Lower-Education (Hispanic=104, Asian=54, Black=122, White=179) and Higher-Education (Hispanic=66, Asian=99, Black=66, White=210). Participants who did not self-identify as male were asked whether they regularly see a gynecologist; the subgroup sizes were Lower-Education (Hispanic=100, Asian=50, Black=91, White=160) and Higher-Education (Hispanic=51, Asian=86, Black=60, and White 137). The reported percentages are calculated based on the subgroup sizes, respectively.

c Regarding care decision preference and experience, participants were asked Q1: “From not at all important (1) to extremely important (5), how important is it for you to have a say in choosing your own provider?” and Q2: “On a scale from very difficult (1) to very easy (5), how difficult would you say it is for you to find a healthcare provider when you need one?”
